# Supplementary figures and images for: The potentially beneficial central nervous system activity profile of ivacaftor and its metabolites
Source: PubMed Central journal article supplement — ERJ Open Res. 2018 Mar 13;4(1):00127-2017. doi: 10.1183/23120541.00127-2017 (PMC5850045; doi:10.1183/23120541.00127-2017), 2018-03-13

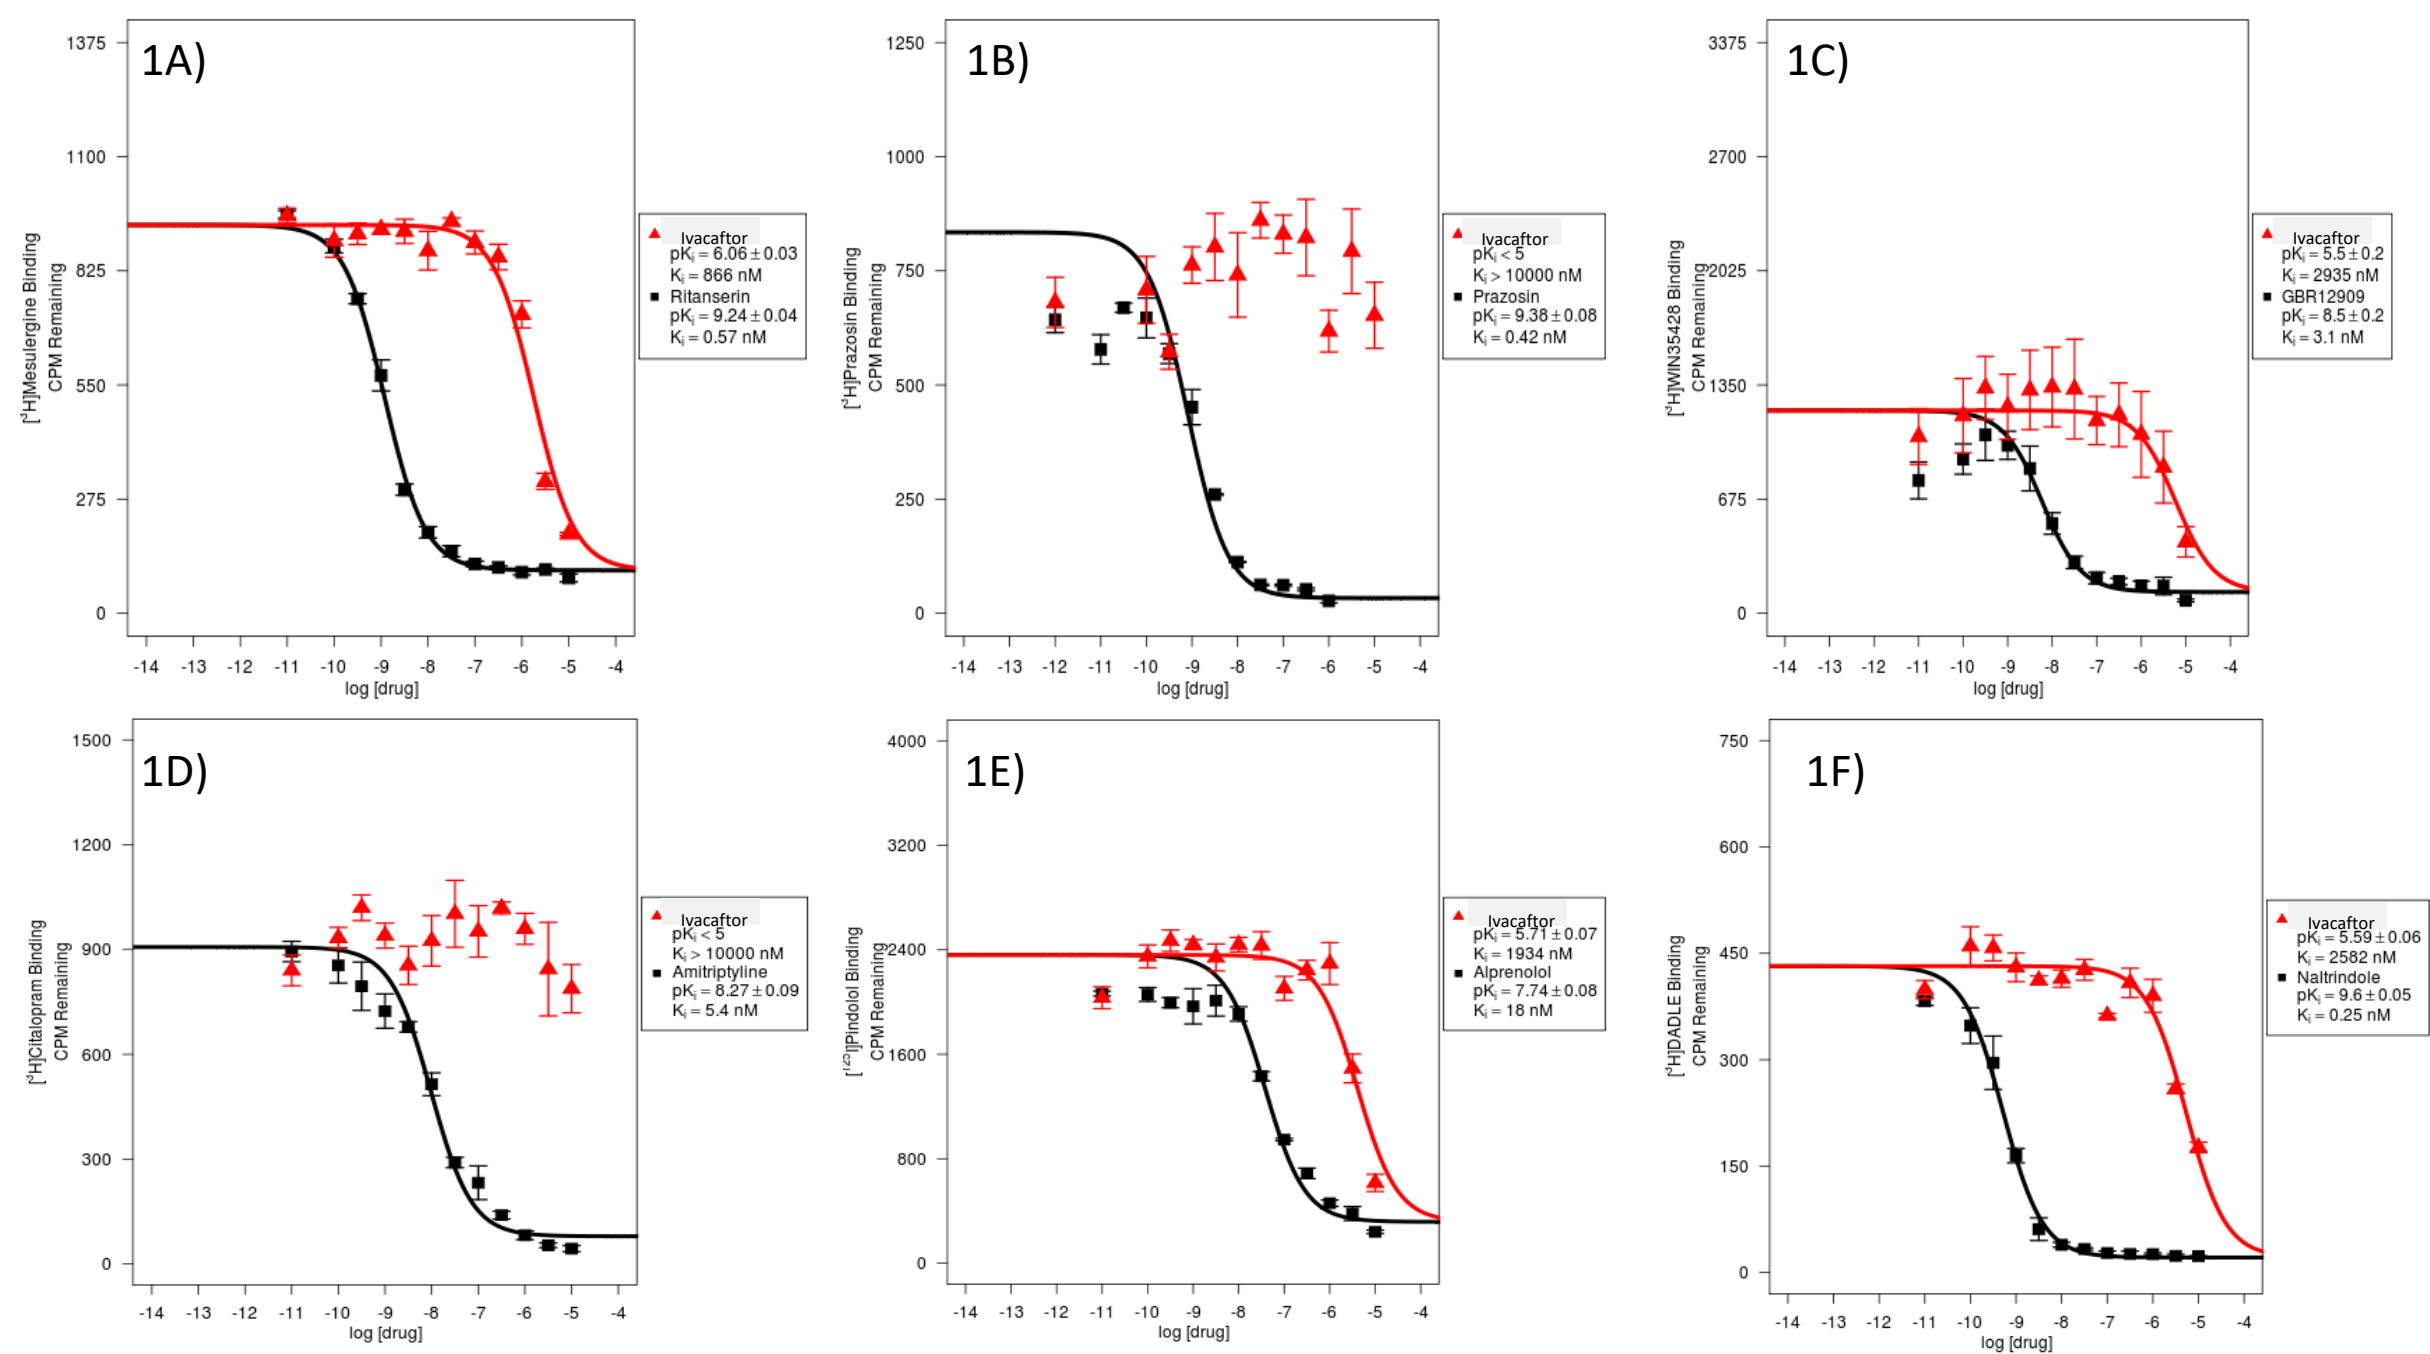

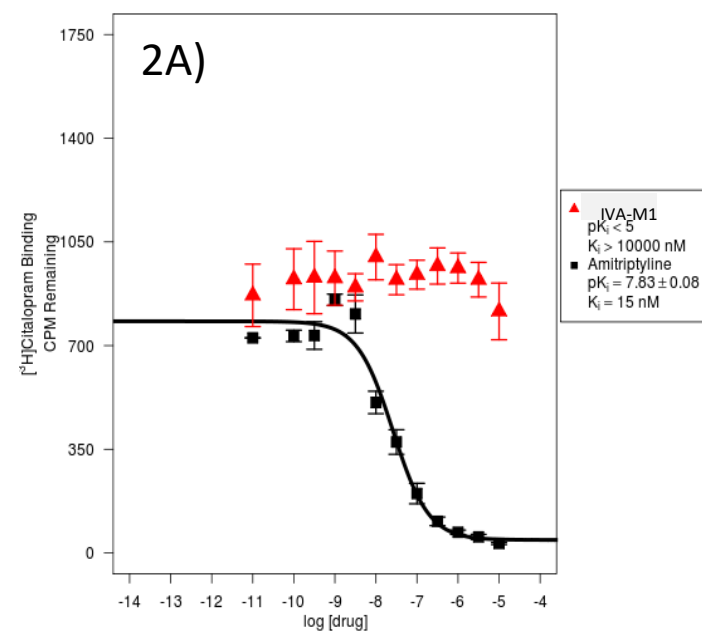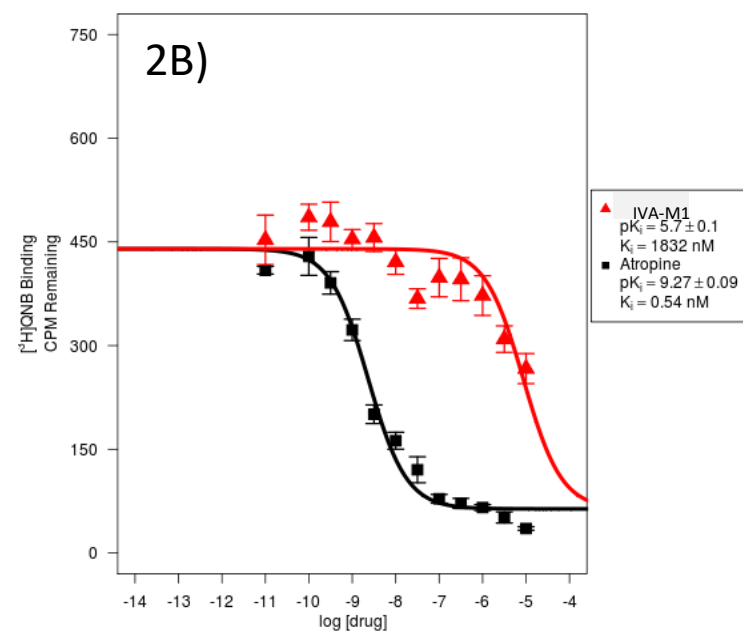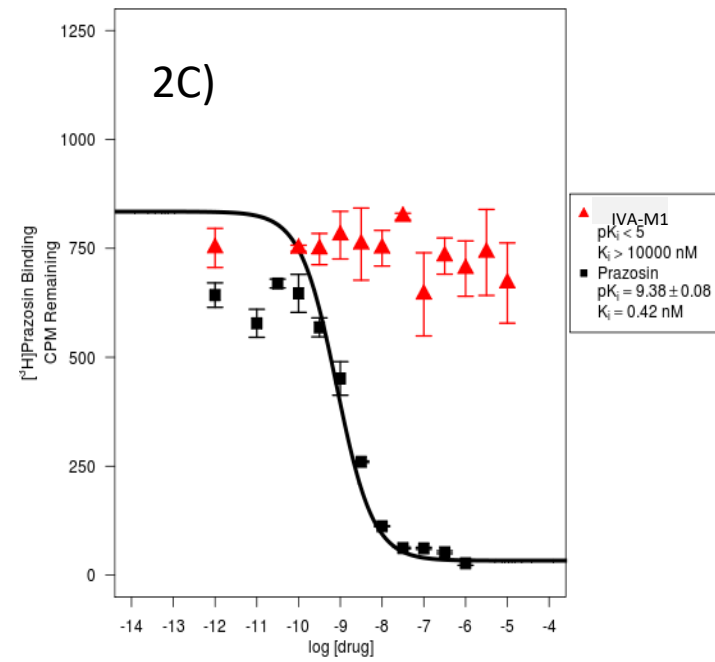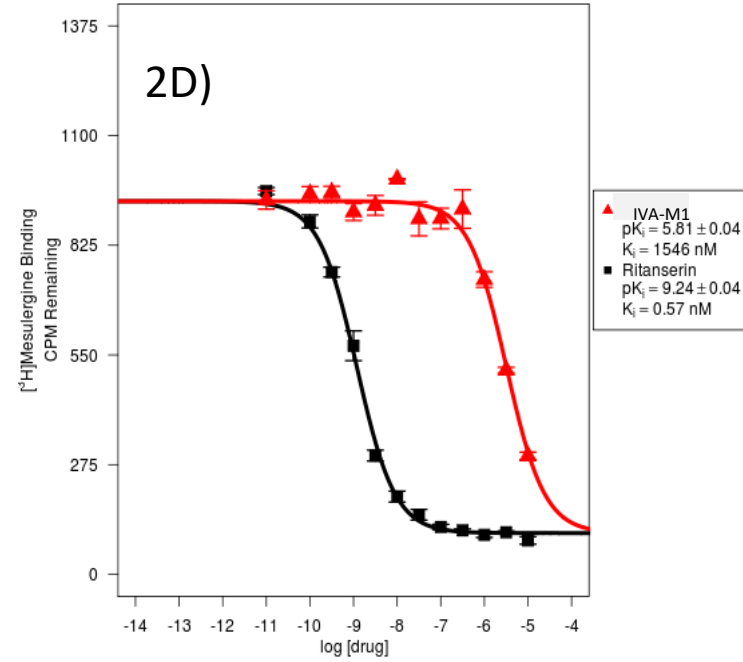

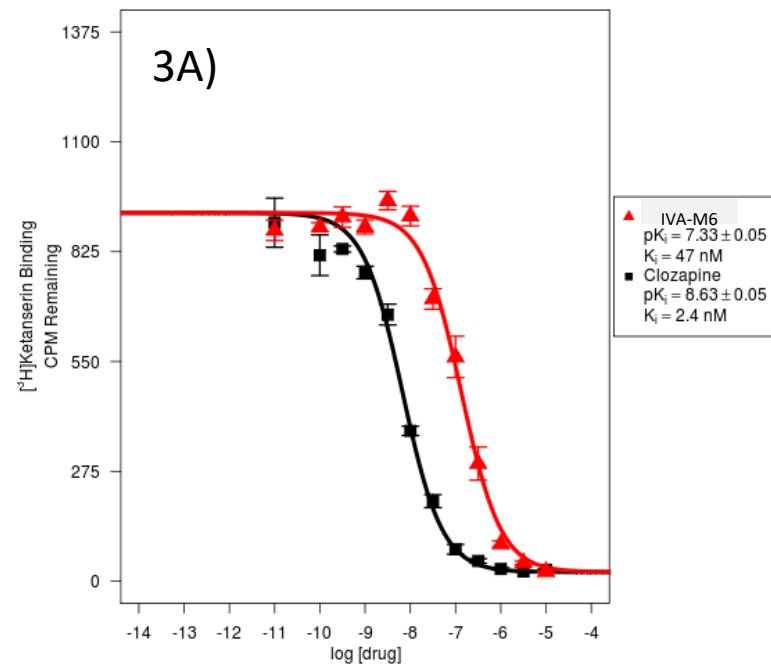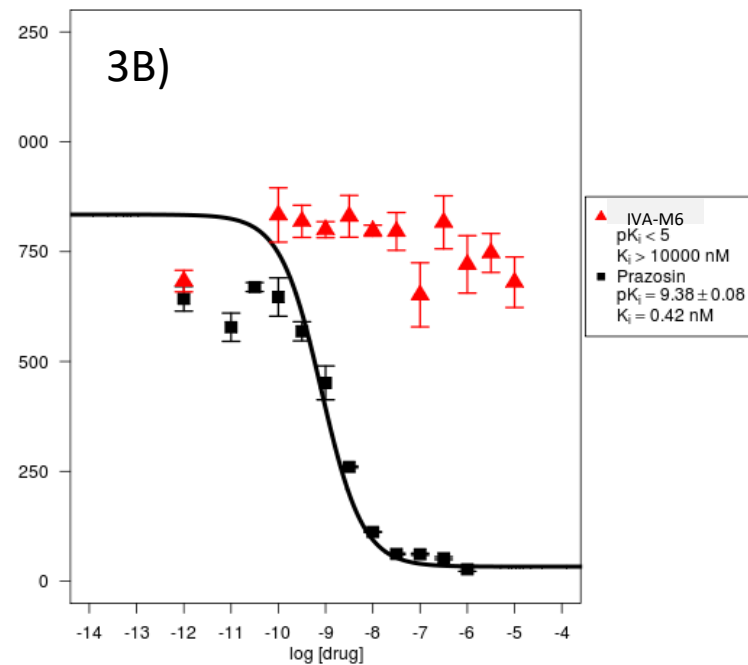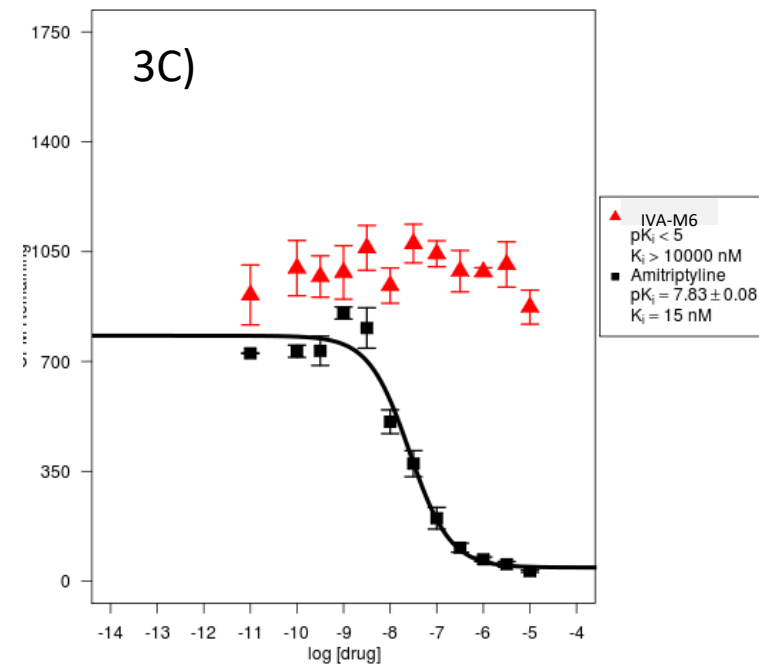

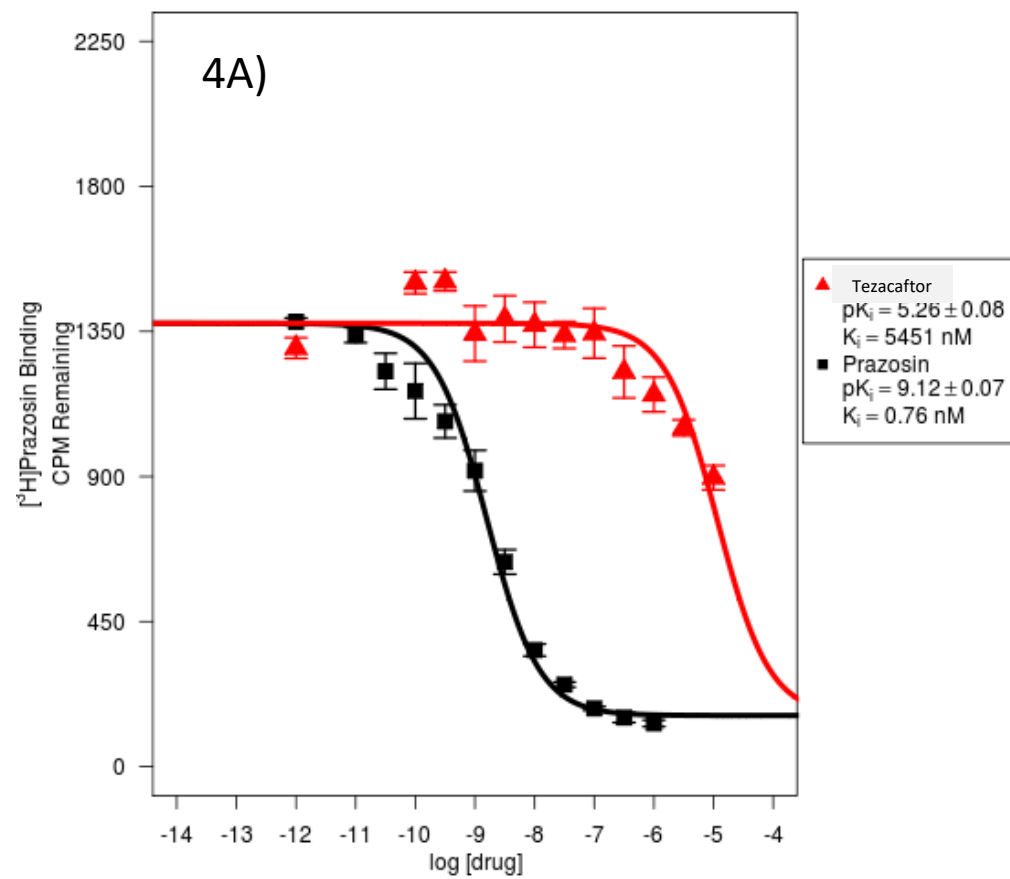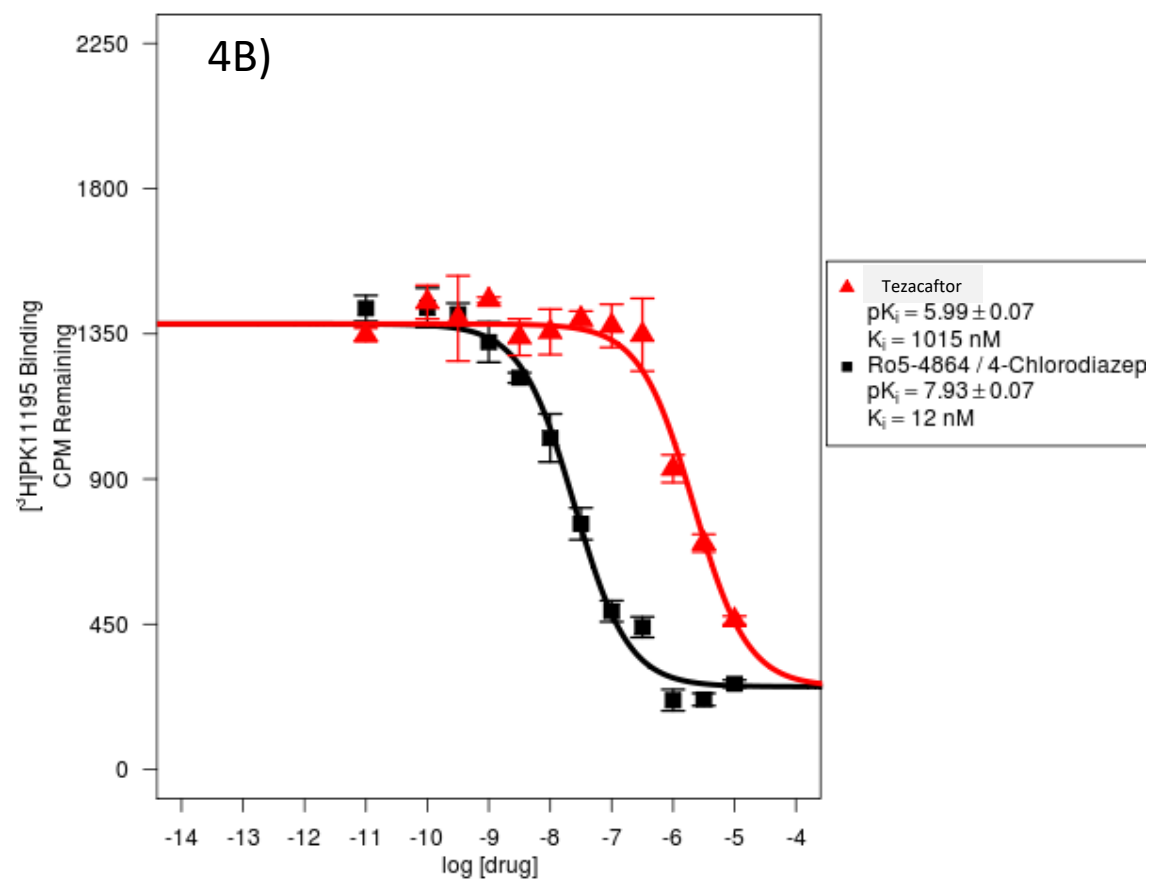

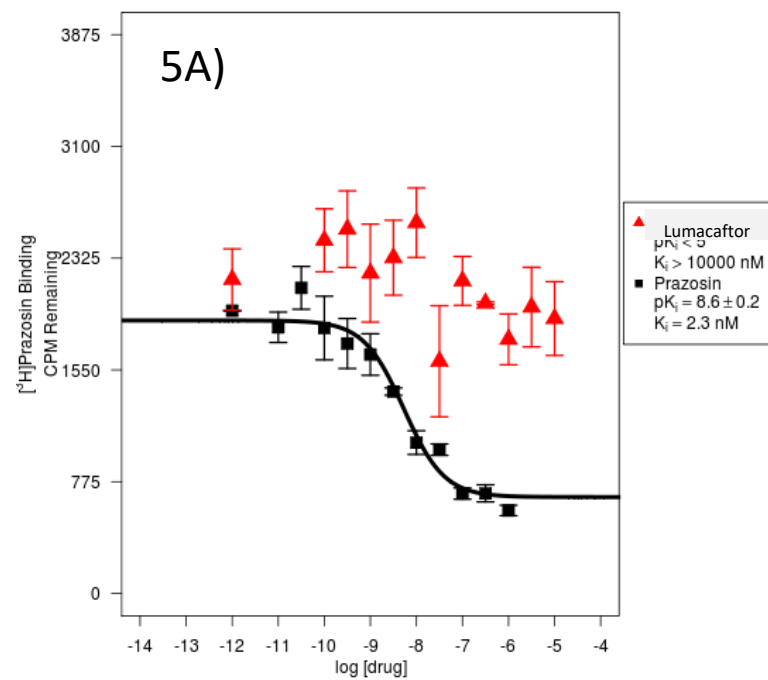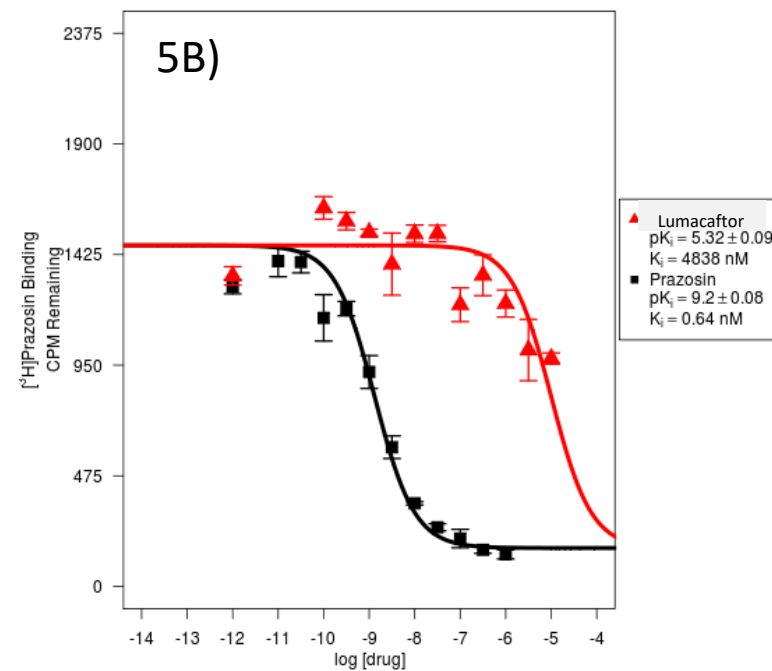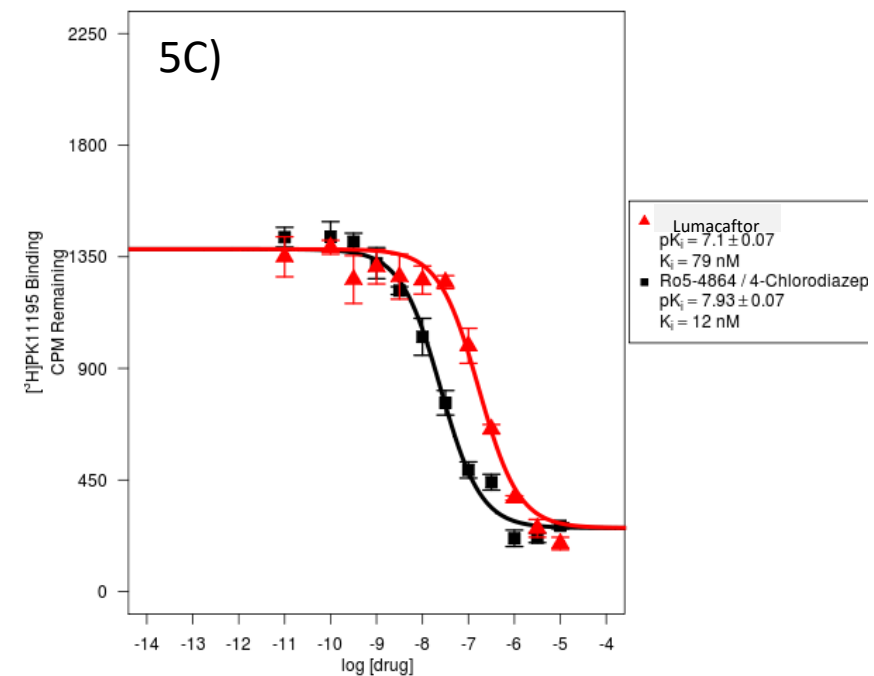

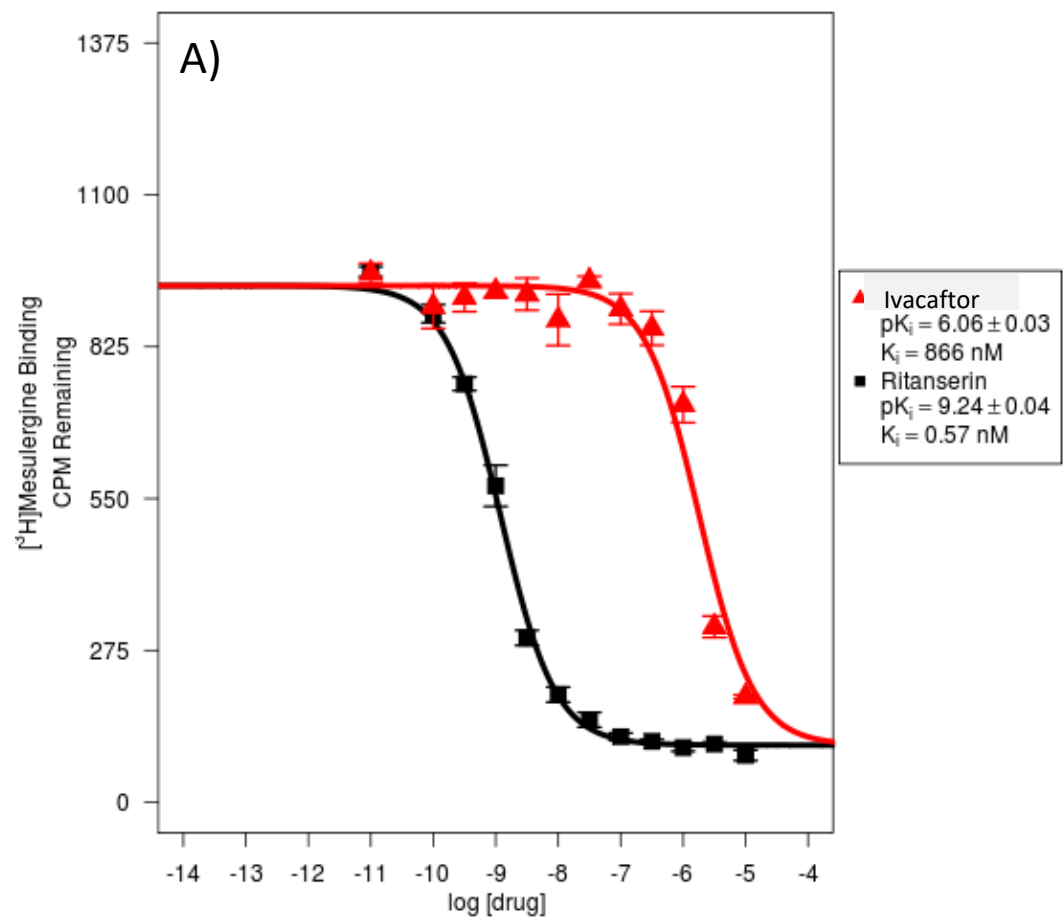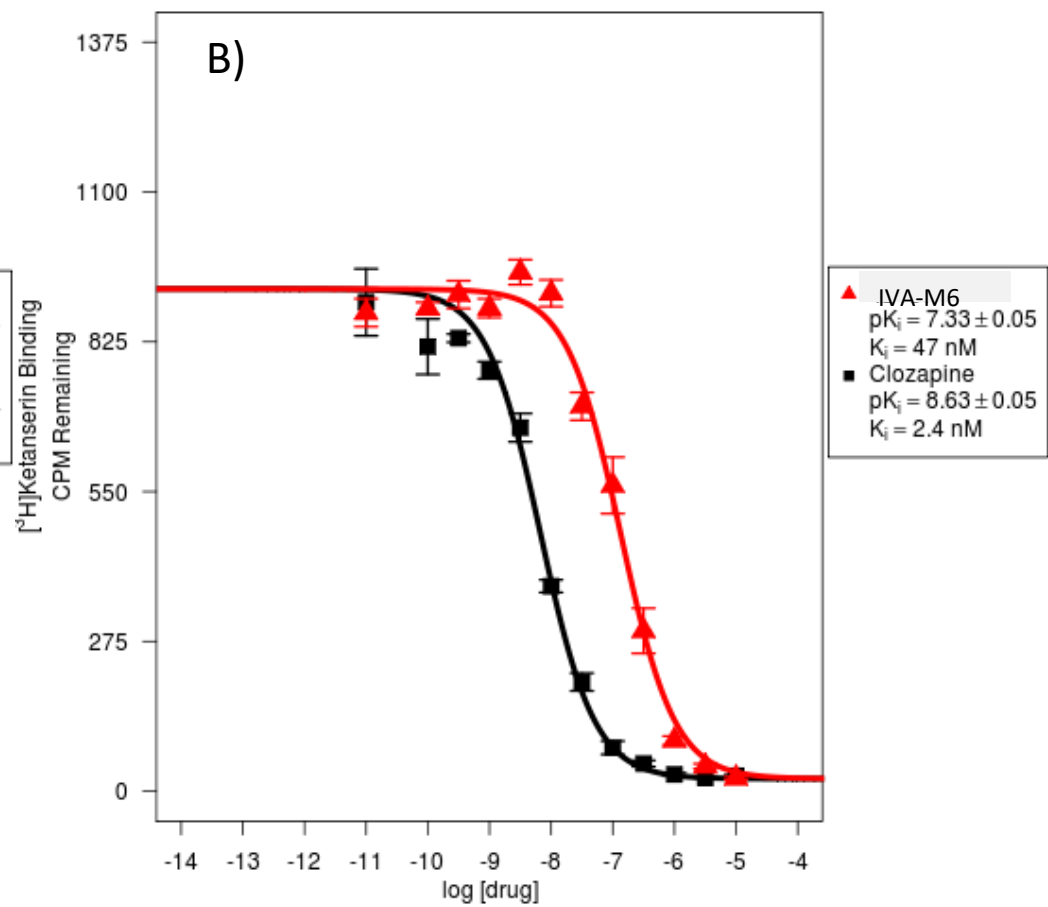

Supplement: 00127-2017_Supplementary_Figures.pdf [file 00127-2017_Supplementary_Figures.pdf]
